# Supplementary material for: Dual-band white light emission and temperature-dependent luminescence of Sn 2+ in the metastable structure of Cs 2 CaCl 4 (H 2 O) 2
Source: Royal Society of Chemistry journal article supplement (doi:10.1039/d4qi03288h), 2025-01-01
Supplement: d4qi03288h1.pdf [file d4qi03288h1.pdf]

## Supporting Information

### Dual-Band White Light Emission and Temperature-Dependent Luminescence of Sn<sup>2+</sup> in the Metastable Structure of Cs<sub>2</sub>CaCl<sub>4</sub>(H<sub>2</sub>O)<sub>2</sub>

*Hu Wang<sup>a</sup>, Yuexiao Pan<sup>a,\*</sup>, Zhenyu Shi<sup>a</sup>, Yelin Cao<sup>a</sup>, Hongzhou Lian<sup>b</sup>, Jun Lin<sup>b,\*</sup>, Qian Miao<sup>a</sup>, Jun Zou<sup>c,d\*</sup>*

*<sup>a</sup>Key Laboratory of Carbon Materials of Zhejiang Province, College of Chemistry and Materials Engineering, Wenzhou University, Wenzhou 325035, P.R. China.*

*<sup>b</sup>State Key Laboratory of Rare Earth Resource Utilization, Changchun Institute of Applied Chemistry, Chinese Academy of Sciences, Changchun 130022, P. R. China.*

*<sup>c</sup>Institute of New Materials & Industrial Technology, Wenzhou University, Wenzhou 325024, China.*

*<sup>d</sup>School of Science, Shanghai Institute of Technology, Shanghai, 201418, China.*

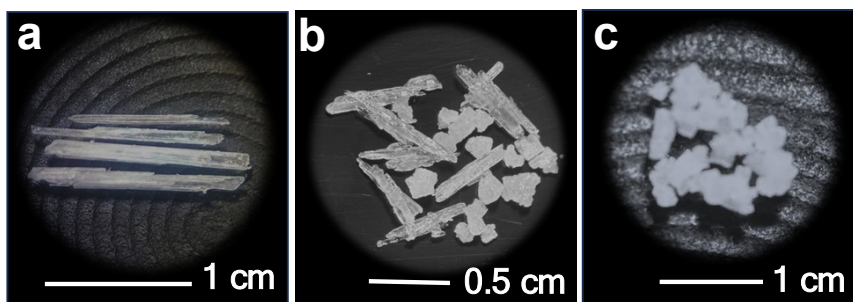

**Fig. S1** Optical images of  $\text{CCCH}:\text{Sn}^{2+}$  crystals synthesized from 600 (a), 300 (b), and 100  $\mu\text{L}$  (c)

$\text{H}_3\text{PO}_2$  under natural lights..

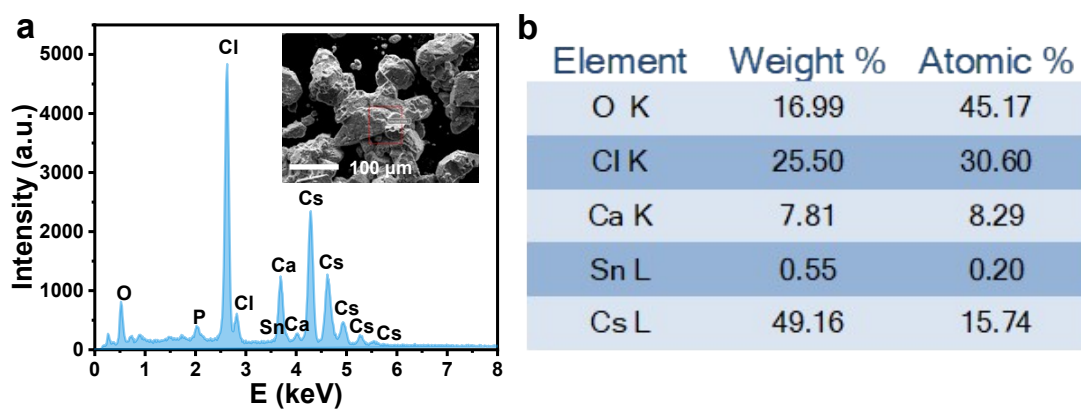

**Fig. S2** (a) EDS spectrum (inset: SEM) and (b) element proportion of  $R\text{-CCCH}:\text{5\%Sn}^{2+}$ .

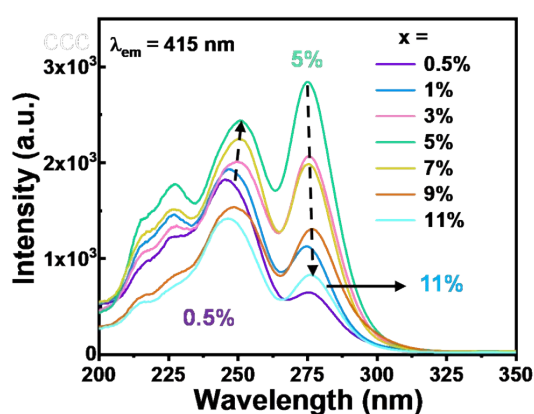

**Fig. S3** Excitation spectra of  $R\text{-CCCH}:\text{xSn}^{2+}$  with  $\text{Sn}^{2+}$  ions concentration.

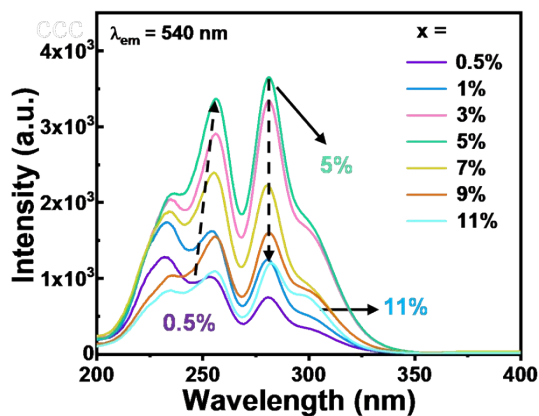

Fig. S4 Excitation spectra of  $R\text{-CCCH}:x\text{Sn}^{2+}$  varied with  $\text{Sn}^{2+}$  ions concentration.

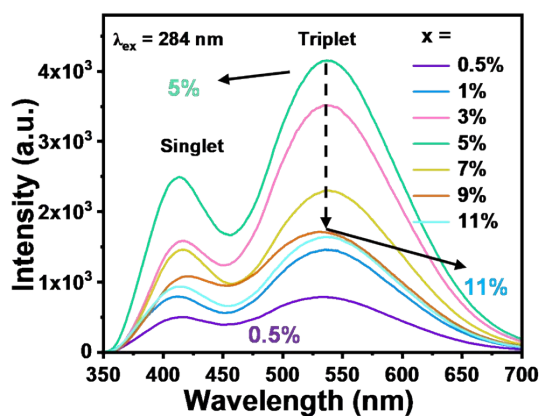

Fig. S5 PL spectra of  $R\text{-CCCH}:x\text{Sn}^{2+}$  with different  $\text{Sn}^{2+}$  concentrations.

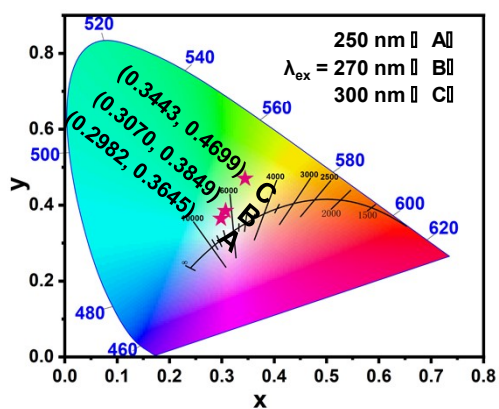

Fig. S6 CIE coordinates of  $R\text{-CCCH}:5\%\text{Sn}^{2+}$  crystals excited by different wavelengths.

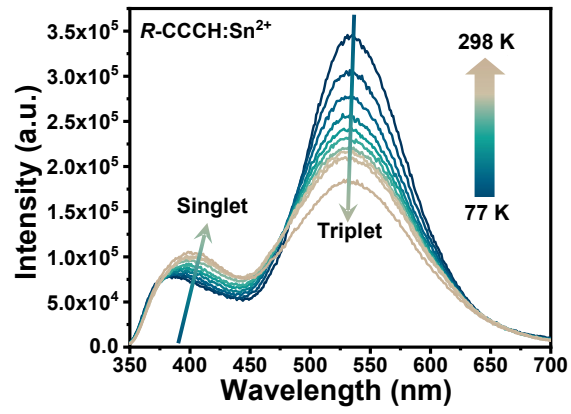

Fig. S7 Emission spectra of R-CCCH:Sn<sup>2+</sup> measured at 77 and 298 K under excitation of 284 nm.

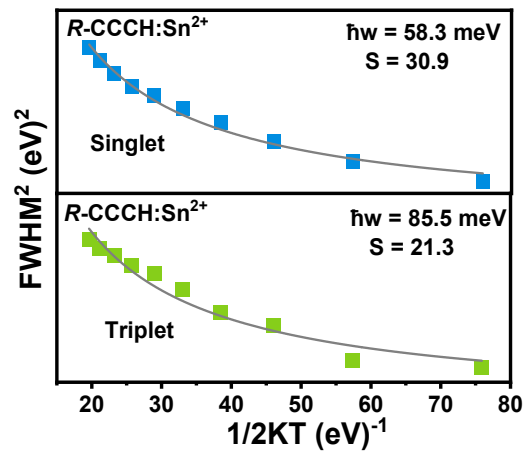

Fig. S8 FWHM of R-CCCH:5%Sn<sup>2+</sup> crystals varied from 77 to 298 K.
